# Supplementary material for: Consequences of Converting Graded to Action Potentials upon Neural Information Coding and Energy Efficiency
Source: PubMed Central journal article supplement (PMC3900385; doi:10.1371/journal.pcbi.1003439), 2014-01-23

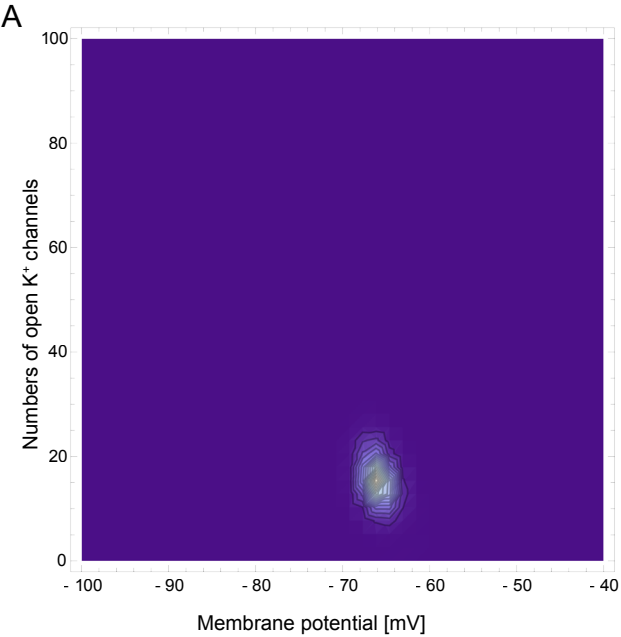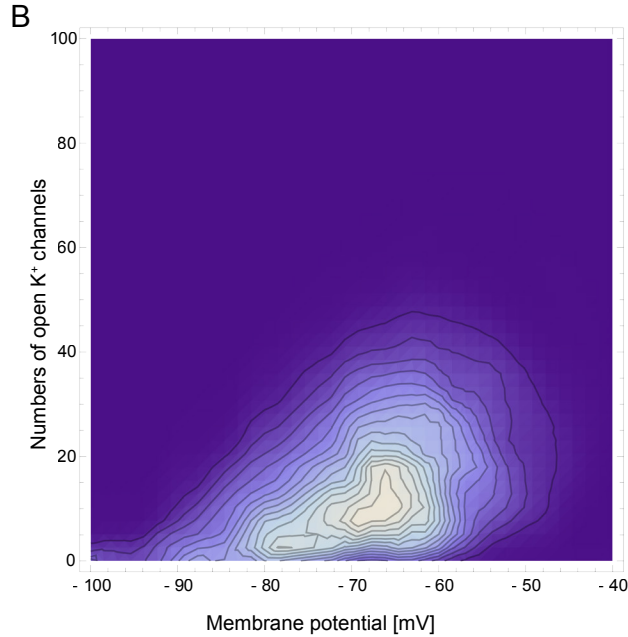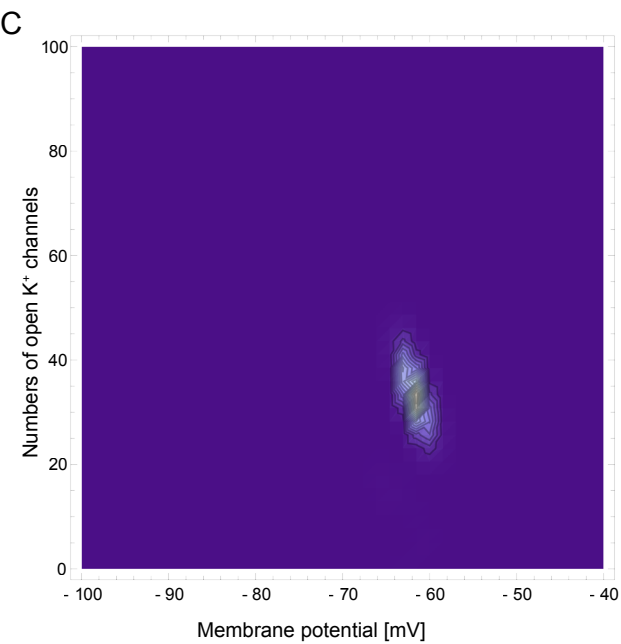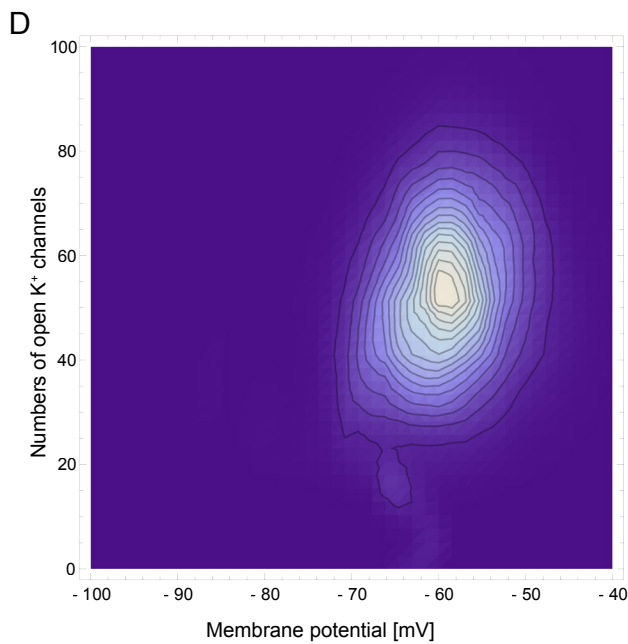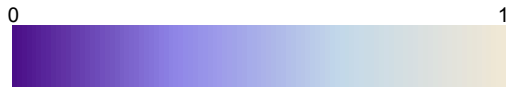

Supplement: pcbi.1003439.s007.pdf [file pcbi.1003439.s007.pdf]
